# Supplementary material
Source: MDPI journal article supplement (https://www.mdpi.com/2073-4344/13/3/576)
Supplement: s1 [file s1]

## Supplementary material

# **Semi-rational design of diaminopimelate dehydrogenase from *Symbiobacterium thermophilum* improved its activity toward hydroxypyruvate for D-serine synthesis**

Ziyao Wang<sup>1</sup>, Haojie Qu<sup>1</sup>, Wenqi Li<sup>1</sup>, Yan Xu<sup>1,2</sup>, Yao Nie<sup>1,3\*</sup>

<sup>1</sup>Lab of Brewing Microbiology and Applied Enzymology, School of Biotechnology and Key Laboratory of Industrial Biotechnology of Ministry of Education, Jiangnan University, Wuxi 214122, China

<sup>2</sup>State Key Laboratory of Food Science and Technology, Jiangnan University, Wuxi 214122, China

<sup>3</sup>Suqian Industrial Technology Research Institute of Jiangnan University, Suqian 223814, China

Correspondence:

E-mail: ynie@jiangnan.edu.cn (Y. Nie)

Table S1 Primers used in this study

|        |                                      |
|--------|--------------------------------------|
| 152G-F | TTACACAAACTTTGGCCCCGGCATGGGCATGGGC   |
| 152A-F | TTACACAAACTTTGGCCCCGGCATGGCCATGGGC   |
| 152V-F | TTACACAAACTTTGGCCCCGGCATGGTCATGGGC   |
| 152L-F | TTACACAAACTTTGGCCCCGGCATGTTAATGGGC   |
| 152I-F | TTACACAAACTTTGGCCCCGGCATGATCATGGGC   |
| 152W-F | TTACACAAACTTTGGCCCCGGCATGTGGATGGGC   |
| 152F-F | TTACACAAACTTTGGCCCCGGCATGTTTCATGGGC  |
| 152P-F | TTACACAAACTTTGGCCCCGGCATGCCCATGGGC   |
| 152S-F | TTACACAAACTTTGGCCCCGGCATGAGCATGGGC   |
| 152T-F | TTACACAAACTTTGGCCCCGGCATGACCATGGGC   |
| 152C-F | TTACACAAACTTTGGCCCCGGCATGTGCATGGGC   |
| 152Y-F | TTACACAAACTTTGGCCCCGGCATGTACATGGGC   |
| 152N-F | TTACACAAACTTTGGCCCCGGCATGAACATGGGC   |
| 152Q-F | TTACACAAACTTTGGCCCCGGCATGCAAATGGGC   |
| 152D-F | TTACACAAACTTTGGCCCCGGCATGGACATGGGC   |
| 152E-F | TTACACAAACTTTGGCCCCGGCATGGAAATGGGC   |
| 152K-F | TTACACAAACTTTGGCCCCGGCATGAAGATGGGC   |
| 152R-F | TTACACAAACTTTGGCCCCGGCATGAGAATGGGC   |
| 152H-F | TTACACAAACTTTGGCCCCGGCATGCACATGGGC   |
| 152-R  | CGGGGCCAAAGTTTGTGTAAGTAATTCCTTGGG    |
| 92G-F  | CTTTGGCCCCGGCATGTCCATGGGCGGATCAGTAG  |
| 92A-F  | CTTTGGCCCCGGCATGTCCATGGGCGCATCAGTAG  |
| 92V-F  | CTTTGGCCCCGGCATGTCCATGGGCGTATCAGTAG  |
| 92L-F  | CTTTGGCCCCGGCATGTCCATGGGCTTATCAGTAG  |
| 92I-F  | CTTTGGCCCCGGCATGTCCATGGGCATATCAGTAG  |
| 92M-F  | CTTTGGCCCCGGCATGTCCATGGGCATGTCAGTAG  |
| 92W-F  | CTTTGGCCCCGGCATGTCCATGGGCTGGTCAGTAG  |
| 92F-F  | CTTTGGCCCCGGCATGTCCATGGGCTTCTCAGTAG  |
| 92P-F  | CTTTGGCCCCGGCATGTCCATGGGCCCCCTCAGTAG |
| 92S-F  | CTTTGGCCCCGGCATGTCCATGGGCTCCTCAGTAG  |
| 92T-F  | CTTTGGCCCCGGCATGTCCATGGGCACCTCAGTAG  |
| 92C-F  | CTTTGGCCCCGGCATGTCCATGGGCTGCTCAGTAG  |
| 92Y-F  | CTTTGGCCCCGGCATGTCCATGGGCTACTCAGTAG  |
| 92N-F  | CTTTGGCCCCGGCATGTCCATGGGCAACTCAGTAG  |
| 92Q-F  | CTTTGGCCCCGGCATGTCCATGGGCCAATCAGTAG  |
| 92E-F  | CTTTGGCCCCGGCATGTCCATGGGCGAATCAGTAG  |
| 92K-F  | CTTTGGCCCCGGCATGTCCATGGGCAAGTCAGTAG  |
| 92R-F  | CTTTGGCCCCGGCATGTCCATGGGCCGCTCAGTAG  |
| 92H-F  | CTTTGGCCCCGGCATGTCCATGGGCCACTCAGTAG  |
| 92-R   | TGGACATGCCGGGGCCAAAGTTTGTGTAAG       |
| 253G-F | TGCCCAATGCATACCTTTGGGATCGGGACTAGGCC  |
| 253A-F | TGCCCAATGCATACCTTTGGGATCGGCCCTAGGCC  |

|        |                                      |
|--------|--------------------------------------|
| 253V-F | TGCCCAATGCATACCTTTGGGATCGGTCCCTAGGCC |
| 253L-F | TGCCCAATGCATACCTTTGGGATCGTTACTAGGCC  |
| 253I-F | TGCCCAATGCATACCTTTGGGATCGATCCTAGGCC  |
| 253M-F | TGCCCAATGCATACCTTTGGGATCGATGCTAGGCC  |
| 253W-F | TGCCCAATGCATACCTTTGGGATCGTGGCTAGGCC  |
| 253F-F | TGCCCAATGCATACCTTTGGGATCGTTCCTAGGCC  |
| 253P-F | TGCCCAATGCATACCTTTGGGATCGCCCCTAGGCC  |
| 253S-F | TGCCCAATGCATACCTTTGGGATCGAGCCTAGGCC  |
| 253T-F | TGCCCAATGCATACCTTTGGGATCGACCCTAGGCC  |
| 253C-F | TGCCCAATGCATACCTTTGGGATCGTGCCTAGGCC  |
| 253Y-F | TGCCCAATGCATACCTTTGGGATCGTCCCTAGGCC  |
| 253Q-F | TGCCCAATGCATACCTTTGGGATCGCAACTAGGCC  |
| 253D-F | TGCCCAATGCATACCTTTGGGATCGGCACTAGGCC  |
| 253E-F | TGCCCAATGCATACCTTTGGGATCGGAACTAGGCC  |
| 253K-F | TGCCCAATGCATACCTTTGGGATCGAAGCTAGGCC  |
| 253R-F | TGCCCAATGCATACCTTTGGGATCGGAGCTAGGCC  |
| 253H-F | TGCCCAATGCATACCTTTGGGATCGCACCTAGGCC  |
| 253-R  | G TTCAGCCCCGATTATCATTCGCGTACCCG      |
| 122G-F | GCTTAGACAAACGTTGCCAGCTAAGGATAACGGC   |
| 122A-F | GCTTAGACAAACGTTGCCAGCTAAGCCTAACGGC   |
| 122V-F | GCTTAGACAAACGTTGCCAGCTAAGTCTAACGGC   |
| 122L-F | GCTTAGACAAACGTTGCCAGCTAATTATAACGGC   |
| 122I-F | GCTTAGACAAACGTTGCCAGCTAAATCTAACGGC   |
| 122M-F | GCTTAGACAAACGTTGCCAGCTAAATGTAACGGC   |
| 122W-F | GCTTAGACAAACGTTGCCAGCTAATGGTAACGGC   |
| 122F-F | GCTTAGACAAACGTTGCCAGCTAATTCTAACGGC   |
| 122P-F | GCTTAGACAAACGTTGCCAGCTAACCCTAACGGC   |
| 122S-F | GCTTAGACAAACGTTGCCAGCTAAAGCTAACGGC   |
| 122T-F | GCTTAGACAAACGTTGCCAGCTAAACCTAACGGC   |
| 122C-F | GCTTAGACAAACGTTGCCAGCTAATGCTAACGGC   |
| 122Y-F | GCTTAGACAAACGTTGCCAGCTAATCCTAACGGC   |
| 122N-F | GCTTAGACAAACGTTGCCAGCTAAAACTAACGGC   |
| 122Q-F | GCTTAGACAAACGTTGCCAGCTAACAATAACGGC   |
| 122E-F | GCTTAGACAAACGTTGCCAGCTAAGAATAACGGC   |
| 122K-F | GCTTAGACAAACGTTGCCAGCTAAAAGTAACGGC   |
| 122R-F | GCTTAGACAAACGTTGCCAGCTAAGAGTAACGGC   |
| 122H-F | GCTTAGACAAACGTTGCCAGCTAACACTAACGGC   |
| 122-R  | CCCGCGTATTAACTACGGCGCGCGTCGGCC       |

---

Table S2 The rank of docking results of HPPA

| Ligand | Rank    | Dock energy |
|--------|---------|-------------|
| HPPA   | HPPA1_1 | -4.21       |
|        | HPPA1_2 | -4.13       |
|        | HPPA1_3 | -3.99       |
|        | HPPA1_4 | -3.92       |
|        | HPPA1_5 | -3.84       |
|        | HPPA1_6 | -3.76       |
|        | HPPA1_7 | -3.71       |
|        | HPPA1_8 | -3.68       |

Table S3 The retention times of the substances analyzed by high-performance liquid chromatography (HPLC)

| Substance | Retention time (min) |
|-----------|----------------------|
| D-Ser     | 14.322               |
| L-Ser     | 13.780               |
| HPPA      | 15.873               |

Table S4 Hydrogen bond occupancy

| Donor | Acceptor | Hydrogen bond occupancy |
|-------|----------|-------------------------|
| M152S | HPPA     | 87.3%                   |
| HPPA  | M152S    | 92.1%                   |
| D92E  | HPPA     | 89.4%                   |
| 152M  | HPPA     | 79.8%                   |
